# Supplementary material for: Mapping of Crowdsourcing in Health: Systematic Review
Source: PubMed Central journal article supplement (PMC5974463; doi:10.2196/jmir.9330), 2018-05-15
Supplement: jmir_v20i5e187_app1.pdf [file jmir_v20i5e187_app1.pdf]

Multimedia Appendix 1. Protocol of the systematic review.

- We uploaded a prespecified protocol to a publicly accessible institutional Website (<http://www.clinicalepidemio.fr/protocols/>).
