# Supplementary material for: Mapping of Crowdsourcing in Health: Systematic Review
Source: PubMed Central journal article supplement (PMC5974463; doi:10.2196/jmir.9330), 2018-05-15
Supplement: jmir_v20i5e187_app2.pdf [file jmir_v20i5e187_app2.pdf]

Multimedia Appendix 2. Search terms for MEDLINE and EMBASE (March 30<sup>th</sup>, 2016).

MEDLINE

|    |                                                                                                                                                                                                                                                                                                                            |          |
|----|----------------------------------------------------------------------------------------------------------------------------------------------------------------------------------------------------------------------------------------------------------------------------------------------------------------------------|----------|
| #1 | "crowdsourcing"[MeSH Terms] OR crowdsource[tiab] OR crowdsourced[tiab] OR crowdsourcers[tiab] OR crowdsources[tiab] OR crowdsourcing[tiab] OR crowd-source[tiab] OR crowd-sourced[tiab] OR crowd-sourcing[tiab] OR crowdworker[tiab] OR crowdworkers[tiab] OR "crowd science"[tiab] OR "crowd-based"[tiab] OR crowds[tiab] | N= 949   |
| #2 | "Mechanical Turk"[tiab] OR "Mturk"[tiab] OR "crowdflower"[tiab] OR "foldit"[tiab]                                                                                                                                                                                                                                          | N= 229   |
| #3 | "citizen science"[tiab] OR "citizen scientist"[tiab] OR "citizen scientists"[tiab]                                                                                                                                                                                                                                         | N= 270   |
| #4 | Microtask[tiab] OR "online task"[tiab]                                                                                                                                                                                                                                                                                     | N= 19    |
| #5 | #1 OR #2 OR #3 OR #4                                                                                                                                                                                                                                                                                                       | N= 1 363 |

EMBASE

|    |                                                                                                                                                                                                                                                |         |
|----|------------------------------------------------------------------------------------------------------------------------------------------------------------------------------------------------------------------------------------------------|---------|
| #1 | crowdsource OR crowdsourced OR crowdsourcers OR crowdsources OR 'crowdsourcing'/exp OR 'crowd source' OR 'crowd sourced' OR 'crowd sourcing'/exp OR crowdworker OR crowdworkers OR 'crowd science' OR 'crowd-based' OR crowds AND [embase]/lim | N = 705 |
| #2 | 'mechanical turk' OR 'mturk' OR 'crowdflower' OR 'foldit' AND [embase]/lim                                                                                                                                                                     | N = 164 |
| #3 | 'citizen science' OR 'citizen scientist' OR 'citizen scientists' AND [embase]/lim                                                                                                                                                              | N = 177 |
| #4 | microtask OR 'online task' AND [embase]/lim                                                                                                                                                                                                    | N= 12   |
| #5 | #1 OR #2 OR #3 OR #4                                                                                                                                                                                                                           | N= 991  |
