# Supplementary material for: Mapping of Crowdsourcing in Health: Systematic Review
Source: PubMed Central journal article supplement (PMC5974463; doi:10.2196/jmir.9330), 2018-05-15
Supplement: jmir_v20i5e187_app3.pdf [file jmir_v20i5e187_app3.pdf]

Multimedia Appendix 3. Search strategy for ClinicalTrials.gov.

ClinicalTrials.gov: <https://clinicaltrials.gov/>

Advanced search:

Other terms: “crowdsourcing”

First posted: up to 03/30/2016.
