# Supplementary material for: Mapping of Crowdsourcing in Health: Systematic Review
Source: PubMed Central journal article supplement (PMC5974463; doi:10.2196/jmir.9330), 2018-05-15

Multimedia Appendix 5. Flow diagram of selection of studies applying crowdsourcing in health.

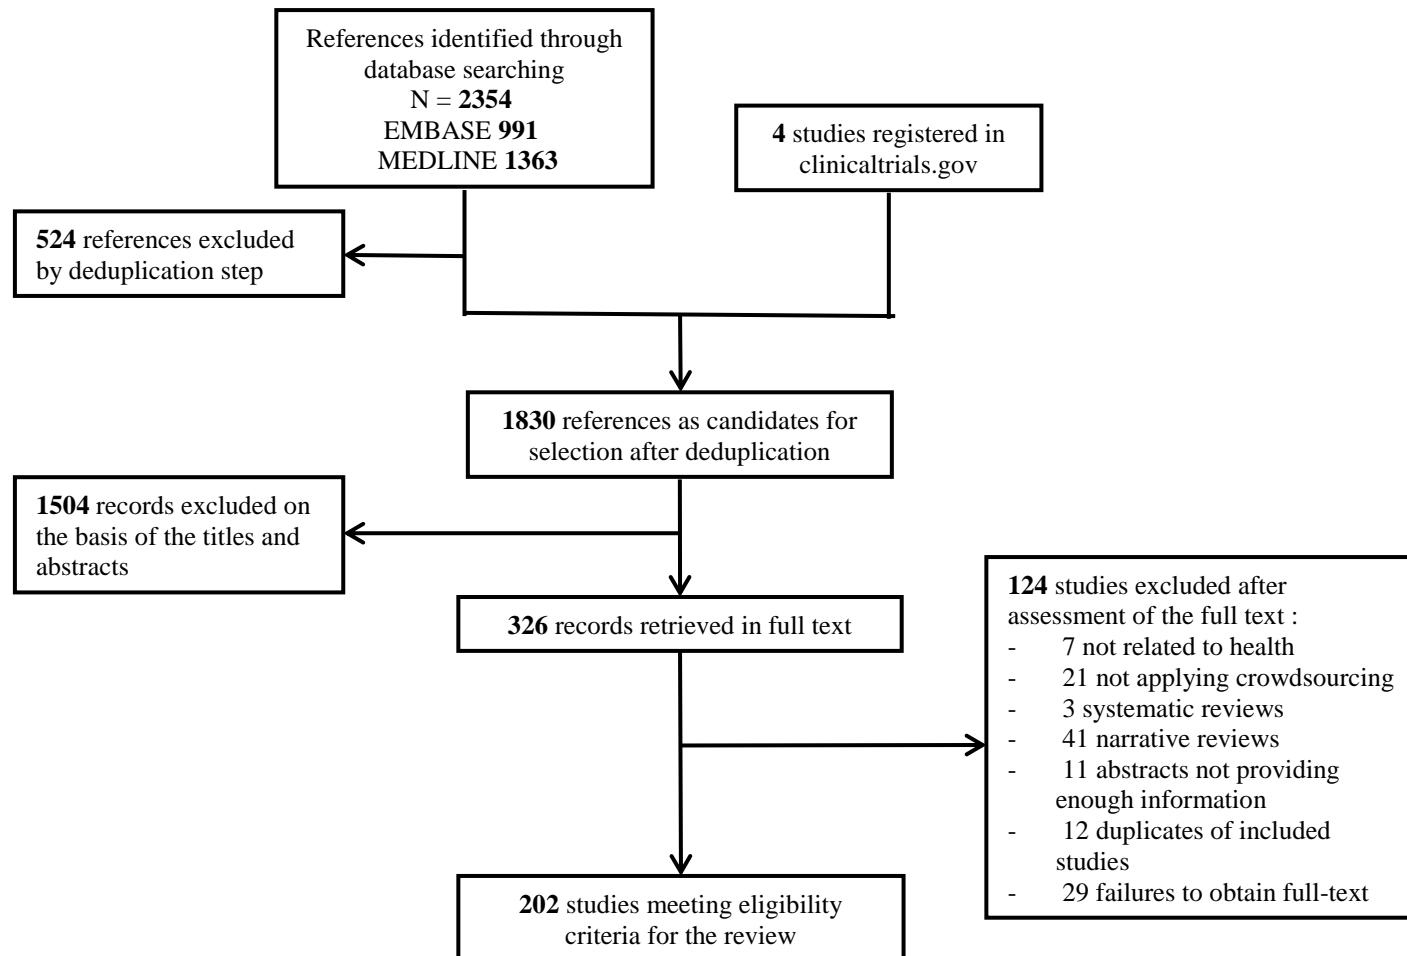

Supplement: jmir_v20i5e187_app5.pdf [file jmir_v20i5e187_app5.pdf]
